# Supplementary material for: A Sensory Bias Has Triggered the Evolution of Egg-Spots in Cichlid Fishes
Source: PubMed Central journal article supplement (PMC3196499; doi:10.1371/journal.pone.0025601), 2011-10-18

**A**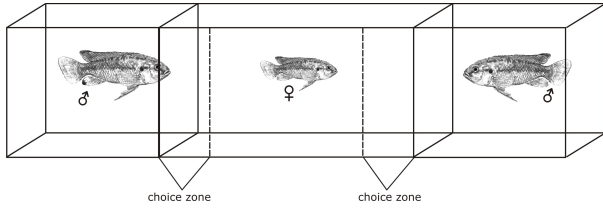**B**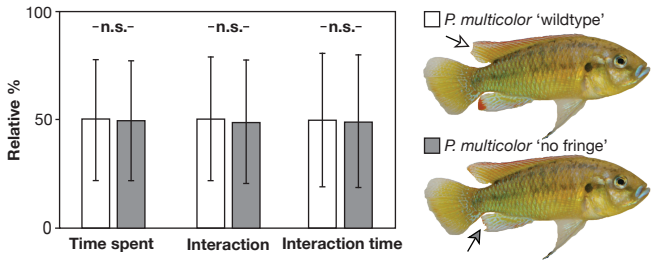

Supplement: pone.0025601.s001.pdf [file pone.0025601.s001.pdf]
