# Supplementary material for: A Sensory Bias Has Triggered the Evolution of Egg-Spots in Cichlid Fishes
Source: PubMed Central journal article supplement (PMC3196499; doi:10.1371/journal.pone.0025601), 2011-10-18
Supplement: pone.0025601.s002.pdf [file pone.0025601.s002.pdf]

| <b>species</b>                       | <b>sample size</b> | <b>yellow</b> | <b>orange</b> | <b>red</b> | <b>blue</b> | <b>green</b> | <b>goodness of fit</b> |
|--------------------------------------|--------------------|---------------|---------------|------------|-------------|--------------|------------------------|
| <i>Altalamprologus calvus</i>        | 45                 | 6             | 21            | 162        | 0           | 1            | p<0.001                |
| <i>Altalamprologus compressiceps</i> | 50                 | 77            | 104           | 11         | 2           | 10           | p<0.001                |
| <i>Astatotilapia burtoni</i>         | 36                 | 11            | 43            | 154        | 0           | 0            | p<0.001                |
| <i>Chalinochromis brichardi</i>      | 45                 | 13            | 31            | 10         | 7           | 2            | p<0.001                |
| <i>Cyphotilapia frontosa</i>         | 43                 | 14            | 29            | 11         | 6           | 30           | p<0.001                |
| <i>Cyprichromis sp. leptosoma</i>    | 50                 | 8             | 0             | 1          | 0           | 11           | p<0.001                |
| <i>Julidochromis dickfeldi</i>       | 30                 | 3             | 75            | 33         | 0           | 9            | p<0.001                |
| <i>Julidochromis regani</i>          | 27                 | 11            | 13            | 20         | 0           | 9            | p<0.001                |
| <i>Neolamprologus sexfasciatus</i>   | 18                 | 3             | 2             | 62         | 0           | 24           | p<0.001                |
| <i>Ophthalmotilapia nasuta</i>       | 12                 | 2             | 4             | 0          | 0           | 14           | p<0.001                |
| <i>Petrochromis polyodon</i>         | 11                 | 17            | 48            | 16         | 1           | 2            | p<0.001                |
| <i>Tropheus duboisi</i>              | 70                 | 67            | 169           | 250        | 6           | 18           | p<0.001                |
| <i>Tropheus moorii</i>               | 30                 | 22            | 32            | 4          | 0           | 2            | p<0.001                |
| <i>Xenotilapia papilio</i>           | 75                 | 1             | 8             | 31         | 0           | 1            | p<0.001                |
