# Supplementary material for: A Sensory Bias Has Triggered the Evolution of Egg-Spots in Cichlid Fishes
Source: PubMed Central journal article supplement (PMC3196499; doi:10.1371/journal.pone.0025601), 2011-10-18
Supplement: pone.0025601.s003.pdf [file pone.0025601.s003.pdf]

| <b>binomial test</b> | <i>A. calvus</i> | <i>A. compressiceps</i> | <i>A. burtoni</i> | <i>C. brichardi</i> | <i>C. frontosa</i> | <i>C. sp. leptosoma</i> | <i>J. dickfeldi</i> | <i>J. regani</i> | <i>N. sexfasciatus</i> | <i>O. nasuta</i> |
|----------------------|------------------|-------------------------|-------------------|---------------------|--------------------|-------------------------|---------------------|------------------|------------------------|------------------|
| yellow vs. orange    | 0.0059           | 0.0530                  | < 0.0001          | 0.0096              | 0.0315             | 0.0078                  | < 0.0001            | 0.8388           | 1                      | 0.6875           |
| yellow vs. red       | < 0.0001         | < 0.0001                | < 0.0001          | 0.6776              | 0.6900             | 0.0391                  | < 0.0001            | 0.1496           | < 0.0001               | 0.5000           |
| yellow vs. blue      | 0.0313           | < 0.0001                | 0.0010            | 0.2632              | 0.1153             | 0.0078                  | 0.2500              | 0.0010           | 0.2500                 | 0.5000           |
| yellow vs. green     | 0.1250           | < 0.0001                | 0.0010            | 0.0074              | 0.0226             | 0.6476                  | 0.1460              | 0.8238           | < 0.0001               | 0.0042           |
| orange vs. red       | < 0.0001         | < 0.0001                | < 0.0001          | 0.0015              | 0.0064             | -                       | < 0.0001            | 0.2962           | < 0.0001               | 0.1250           |
| orange vs. blue      | < 0.0001         | < 0.0001                | < 0.0001          | 0.0001              | 0.0001             | -                       | < 0.0001            | 0.0002           | 0.5000                 | 0.1250           |
| orange vs. green     | < 0.0001         | < 0.0001                | < 0.0001          | < 0.0001            | 1                  | 0.0010                  | < 0.0001            | 0.5235           | < 0.0001               | 0.0309           |
| red vs. blue         | < 0.0001         | 0.0225                  | < 0.0001          | 0.6291              | 0.3323             | -                       | < 0.0001            | < 0.0001         | < 0.0001               | -                |
| red vs. green        | < 0.0001         | 1                       | < 0.0001          | 0.0386              | 0.0043             | 0.0063                  | 0.0003              | 0.0614           | < 0.0001               | 0.0001           |
| blue vs. green       | -                | 0.0386                  | -                 | 0.1797              | < 0.0001           | 0.0010                  | 0.0039              | 0.0039           | < 0.0001               | 0.0001           |

| <i>P. polyodon</i> | <i>T. duboisi</i> | <i>T. moorii</i> | <i>X. papilio</i> |
|--------------------|-------------------|------------------|-------------------|
| 0.0065             | < 0.0001          | 0.2203           | 0.0391            |
| 1                  | < 0.0001          | 0.0005           | < 0.0001          |
| 0.0001             | < 0.0001          | < 0.0001         | -                 |
| 0.0007             | < 0.0001          | < 0.0001         | 1.5               |
| < 0.0001           | < 0.0001          | < 0.0001         | 0.0003            |
| < 0.0001           | < 0.0001          | < 0.0001         | 0.0078            |
| < 0.0001           | < 0.0001          | < 0.0001         | 0.0391            |
| 0.0003             | < 0.0001          | 0.1250           | < 0.0001          |
| 0.0013             | < 0.0001          | 0.6875           | < 0.0001          |
| 1                  | 0.0227            | 0.5000           | -                 |
