# Supplementary material for: A Sensory Bias Has Triggered the Evolution of Egg-Spots in Cichlid Fishes
Source: PubMed Central journal article supplement (PMC3196499; doi:10.1371/journal.pone.0025601), 2011-10-18
Supplement: pone.0025601.s004.pdf [file pone.0025601.s004.pdf]

**A1 *Astatotilapia burtoni* - males and females (n = 20)**

Friedman test

| parameter      | p-value                |
|----------------|------------------------|
| pecks & chases | 4.38 *10 <sup>-8</sup> |

Wilcoxon signed-rank test

| parameter                 | p-value   | significant?                    |                              |
|---------------------------|-----------|---------------------------------|------------------------------|
|                           |           | (without Bonferroni correction) | (with Bonferroni correction) |
| <b>pecks</b>              |           |                                 |                              |
| red-blue                  | 0.0005199 | < 0.05                          | yes                          |
| yellow-blue               | 0.0006637 | < 0.05                          | yes                          |
| red-green                 | 0.0006807 | < 0.05                          | yes                          |
| yellow-green              | 0.000832  | < 0.05                          | yes                          |
| orange-green              | 0.00909   | < 0.05                          | yes                          |
| orange-blue               | 0.01379   | < 0.05                          | yes                          |
| orange-red                | 0.04538   | < 0.05                          | yes                          |
| orange-yellow             | 0.09316   | > 0.05                          | no                           |
| red-yellow                | 0.6085    | > 0.05                          | no                           |
| blue-green                | 1         | > 0.05                          | no                           |
| <b>chases</b>             |           |                                 |                              |
| red-green                 | 0.001075  | < 0.05                          | yes                          |
| red-blue                  | 0.004363  | < 0.05                          | yes                          |
| red-yellow                | 0.02075   | < 0.05                          | yes                          |
| orange-red                | 0.03242   | < 0.05                          | yes                          |
| orange-blue               | 0.07065   | > 0.05                          | no                           |
| yellow-blue               | 0.1091    | > 0.05                          | no                           |
| orange-green              | 0.1815    | > 0.05                          | no                           |
| orange-yellow             | 0.3271    | > 0.05                          | no                           |
| blue-green                | 0.3523    | > 0.05                          | no                           |
| yellow-green              | 0.673     | > 0.05                          | no                           |
| <b>pecks &amp; chases</b> |           |                                 |                              |
| yellow-blue               | 0.0003143 | < 0.05                          | yes                          |
| red-green                 | 0.0003173 | < 0.05                          | yes                          |
| red-blue                  | 0.0004447 | < 0.05                          | yes                          |
| yellow-green              | 0.002072  | < 0.05                          | yes                          |
| orange-blue               | 0.008514  | < 0.05                          | yes                          |
| orange-red                | 0.009677  | < 0.05                          | yes                          |
| orange-green              | 0.02185   | < 0.05                          | yes                          |
| red-yellow                | 0.1146    | > 0.05                          | no                           |
| orange-yellow             | 0.5319    | > 0.05                          | no                           |
| blue-green                | 0.2195    | > 0.05                          | no                           |

**A2 *Astatotilapia burtoni* - females only (n = 9)**

Friedman test

| parameter      | p-value               |
|----------------|-----------------------|
| pecks          | 0.002                 |
| chases         | 3.90*10 <sup>-4</sup> |
| pecks & chases | 2.61*10 <sup>-4</sup> |

Wilcoxon signed-rank test

| parameter                 | p-value  | significant?                    |                              |           |
|---------------------------|----------|---------------------------------|------------------------------|-----------|
|                           |          | (without Bonferroni correction) | (with Bonferroni correction) |           |
| <b>pecks</b>              |          |                                 |                              |           |
| yellow-blue               | 0.02154  | < 0.05                          | yes                          | > 0.05/10 |
| yellow-green              | 0.02154  | < 0.05                          | yes                          | > 0.05/9  |
| red-blue                  | 0.03552  | < 0.05                          | yes                          | > 0.05/8  |
| red-green                 | 0.03552  | < 0.05                          | yes                          | > 0.05/7  |
| orange-blue               | 0.05791  | > 0.05                          | no                           | > 0.05/6  |
| orange-green              | 0.05791  | > 0.05                          | no                           | > 0.05/5  |
| orange-yellow             | 0.4974   | > 0.05                          | no                           | > 0.05/4  |
| red-yellow                | 0.6845   | > 0.05                          | no                           | > 0.05/3  |
| orange-red                | 1        | > 0.05                          | no                           | > 0.05/2  |
| blue-green                | NA       | > 0.05                          | no                           | > 0.05/1  |
| <b>chases</b>             |          |                                 |                              |           |
| red-blue                  | 0.008849 | < 0.05                          | yes                          | > 0.05/10 |
| orange-blue               | 0.02154  | < 0.05                          | yes                          | > 0.05/9  |
| red-yellow                | 0.02225  | < 0.05                          | yes                          | > 0.05/8  |
| red-green                 | 0.03552  | < 0.05                          | yes                          | > 0.05/7  |
| orange-yellow             | 0.05149  | > 0.05                          | no                           | > 0.05/6  |
| orange-green              | 0.2016   | > 0.05                          | no                           | > 0.05/5  |
| yellow-blue               | 0.1003   | > 0.05                          | no                           | > 0.05/4  |
| blue-green                | 0.1003   | > 0.05                          | no                           | > 0.05/3  |
| orange-red                | 0.4461   | > 0.05                          | no                           | > 0.05/2  |
| yellow-green              | 0.7525   | > 0.05                          | no                           | > 0.05/1  |
| <b>pecks &amp; chases</b> |          |                                 |                              |           |
| red-blue                  | 0.00909  | < 0.05                          | yes                          | > 0.05/10 |
| yellow-blue               | 0.01379  | < 0.05                          | yes                          | > 0.05/9  |
| orange-blue               | 0.02201  | < 0.05                          | yes                          | > 0.05/8  |
| red-green                 | 0.02249  | < 0.05                          | yes                          | > 0.05/7  |
| orange-green              | 0.05149  | > 0.05                          | no                           | > 0.05/6  |
| yellow-green              | 0.05906  | > 0.05                          | no                           | > 0.05/5  |
| blue-green                | 0.09751  | > 0.05                          | no                           | > 0.05/4  |
| red-yellow                | 0.1056   | > 0.05                          | no                           | > 0.05/3  |
| orange-yellow             | 0.2719   | > 0.05                          | no                           | > 0.05/2  |
| orange-red                | 0.5294   | > 0.05                          | no                           | > 0.05/1  |

**A3 *Astatotilapia burtoni* - males only (n = 11)**

Friedman test

| parameter      | p-value               |
|----------------|-----------------------|
| pecks          | 1.92*10 <sup>-4</sup> |
| chases         | 0.025                 |
| pecks & chases | 1.37*10 <sup>-4</sup> |

Wilcoxon signed-rank test

| parameter                 | p-value  | significant?                    |                              | significant?                    |                              |
|---------------------------|----------|---------------------------------|------------------------------|---------------------------------|------------------------------|
|                           |          | (without Bonferroni correction) | (with Bonferroni correction) | (without Bonferroni correction) | (with Bonferroni correction) |
| <b>pecks</b>              |          |                                 |                              |                                 |                              |
| red-blue                  | 0.005654 | < 0.05                          | yes                          | > 0.05/10                       | no                           |
| red-green                 | 0.008729 | < 0.05                          | yes                          | > 0.05/9                        | no                           |
| yellow-blue               | 0.01368  | < 0.05                          | yes                          | > 0.05/8                        | no                           |
| orange-red                | 0.01412  | < 0.05                          | yes                          | > 0.05/7                        | no                           |
| yellow-green              | 0.01673  | < 0.05                          | yes                          | > 0.05/6                        | no                           |
| orange-green              | 0.1003   | > 0.05                          | no                           | > 0.05/5                        | no                           |
| orange-yellow             | 0.1213   | > 0.05                          | no                           | > 0.05/4                        | no                           |
| orange-blue               | 0.1814   | > 0.05                          | no                           | > 0.05/3                        | no                           |
| red-yellow                | 0.235    | > 0.05                          | no                           | > 0.05/2                        | no                           |
| blue-green                | 1        | > 0.05                          | no                           | > 0.05/1                        | no                           |
| <b>chases</b>             |          |                                 |                              |                                 |                              |
| red-green                 | 0.01415  | < 0.05                          | yes                          | > 0.05/10                       | no                           |
| orange-red                | 0.0754   | > 0.05                          | no                           | > 0.05/9                        | no                           |
| red-blue                  | 0.1604   | > 0.05                          | no                           | > 0.05/8                        | no                           |
| red-yellow                | 0.3428   | > 0.05                          | no                           | > 0.05/7                        | no                           |
| yellow-green              | 0.3491   | > 0.05                          | no                           | > 0.05/6                        | no                           |
| yellow-blue               | 0.4982   | > 0.05                          | no                           | > 0.05/5                        | no                           |
| orange-yellow             | 0.5248   | > 0.05                          | no                           | > 0.05/4                        | no                           |
| orange-green              | 0.8923   | > 0.05                          | no                           | > 0.05/3                        | no                           |
| orange-blue               | 1        | > 0.05                          | no                           | > 0.05/2                        | no                           |
| blue-green                | 1        | > 0.05                          | no                           | > 0.05/1                        | no                           |
| <b>pecks &amp; chases</b> |          |                                 |                              |                                 |                              |
| red-green                 | 0.005857 | < 0.05                          | yes                          | > 0.05/10                       | no                           |
| orange-red                | 0.007963 | < 0.05                          | yes                          | > 0.05/9                        | no                           |
| yellow-blue               | 0.008909 | < 0.05                          | yes                          | > 0.05/8                        | no                           |
| red-blue                  | 0.01616  | < 0.05                          | yes                          | > 0.05/7                        | no                           |
| yellow-green              | 0.02055  | < 0.05                          | yes                          | > 0.05/6                        | no                           |
| orange-yellow             | 0.06769  | > 0.05                          | no                           | > 0.05/5                        | no                           |
| orange-green              | 0.235    | > 0.05                          | no                           | > 0.05/4                        | no                           |
| orange-blue               | 0.4164   | > 0.05                          | no                           | > 0.05/3                        | no                           |
| red-yellow                | 0.4494   | > 0.05                          | no                           | > 0.05/2                        | no                           |
| blue-green                | 0.8335   | > 0.05                          | no                           | > 0.05/1                        | no                           |

**B1 *Pseudocrenilabrus multicolor* - males and females (n = 20)**

Friedman test

| parameter      | p-value                |
|----------------|------------------------|
| pecks & chases | 3.84*10 <sup>-10</sup> |

Wilcoxon signed-rank test

| parameter                 | p-value   | significant?                    |                              | significant?                    |                              |
|---------------------------|-----------|---------------------------------|------------------------------|---------------------------------|------------------------------|
|                           |           | (without Bonferroni correction) | (with Bonferroni correction) | (without Bonferroni correction) | (with Bonferroni correction) |
| <b>pecks</b>              |           |                                 |                              |                                 |                              |
| yellow-blue               | 0.0002061 | < 0.05                          | yes                          | < 0.05/10                       | yes                          |
| orange-blue               | 0.0003161 | < 0.05                          | yes                          | < 0.05/9                        | yes                          |
| red-blue                  | 0.0004709 | < 0.05                          | yes                          | < 0.05/8                        | yes                          |
| yellow-green              | 0.003481  | < 0.05                          | yes                          | < 0.05/7                        | yes                          |
| orange-green              | 0.01214   | < 0.05                          | yes                          | > 0.05/6                        | no                           |
| red-green                 | 0.01139   | < 0.05                          | yes                          | > 0.05/5                        | no                           |
| orange-yellow             | 0.05541   | > 0.05                          | no                           | > 0.05/4                        | no                           |
| red-yellow                | 0.0839    | > 0.05                          | no                           | > 0.05/3                        | no                           |
| blue-green                | 0.09751   | > 0.05                          | no                           | > 0.05/2                        | no                           |
| orange-red                | 0.8139    | > 0.05                          | no                           | > 0.05/1                        | no                           |
| <b>chases</b>             |           |                                 |                              |                                 |                              |
| red-blue                  | 0.0003149 | < 0.05                          | yes                          | < 0.05/10                       | yes                          |
| red-green                 | 0.001603  | < 0.05                          | yes                          | < 0.05/9                        | yes                          |
| orange-blue               | 0.001714  | < 0.05                          | yes                          | < 0.05/8                        | yes                          |
| yellow-blue               | 0.004097  | < 0.05                          | yes                          | < 0.05/7                        | yes                          |
| orange-red                | 0.01863   | < 0.05                          | yes                          | > 0.05/6                        | no                           |
| red-yellow                | 0.04148   | < 0.05                          | yes                          | > 0.05/5                        | no                           |
| orange-green              | 0.06971   | > 0.05                          | no                           | > 0.05/4                        | no                           |
| blue-green                | 0.1268    | > 0.05                          | no                           | > 0.05/3                        | no                           |
| yellow-green              | 0.1422    | > 0.05                          | no                           | > 0.05/2                        | no                           |
| orange-yellow             | 0.8065    | > 0.05                          | no                           | > 0.05/1                        | no                           |
| <b>pecks &amp; chases</b> |           |                                 |                              |                                 |                              |
| yellow-blue               | 0.0001421 | < 0.05                          | yes                          | < 0.05/10                       | yes                          |
| red-blue                  | 0.0001426 | < 0.05                          | yes                          | < 0.05/9                        | yes                          |
| orange-blue               | 0.0002518 | < 0.05                          | yes                          | < 0.05/8                        | yes                          |
| yellow-green              | 0.0002717 | < 0.05                          | yes                          | < 0.05/7                        | yes                          |
| red-green                 | 0.0005772 | < 0.05                          | yes                          | < 0.05/6                        | yes                          |
| orange-green              | 0.01206   | < 0.05                          | yes                          | > 0.05/5                        | no                           |
| orange-yellow             | 0.01842   | < 0.05                          | yes                          | > 0.05/4                        | no                           |
| blue-green                | 0.04383   | < 0.05                          | yes                          | > 0.05/3                        | no                           |
| orange-red                | 0.04509   | < 0.05                          | yes                          | > 0.05/2                        | no                           |
| red-yellow                | 0.4812    | > 0.05                          | no                           | > 0.05/1                        | no                           |

**B2 *Pseudocrenilabrus multicolor* - females only (n = 10)**

Friedman test

| parameter      | p-value               |
|----------------|-----------------------|
| pecks          | 3.76*10 <sup>-5</sup> |
| chases         | 0.001                 |
| pecks & chases | 2.20*10 <sup>-6</sup> |

Wilcoxon signed-rank test

| parameter                 | p-value  | significant?                    |     | significant?                 |     |
|---------------------------|----------|---------------------------------|-----|------------------------------|-----|
|                           |          | (without Bonferroni correction) |     | (with Bonferroni correction) |     |
| <b>pecks</b>              |          |                                 |     |                              |     |
| red-blue                  | 0.00897  | < 0.05                          | yes | > 0.05/10                    | no  |
| yellow-blue               | 0.00903  | < 0.05                          | yes | > 0.05/9                     | no  |
| orange-blue               | 0.00909  | < 0.05                          | yes | > 0.05/8                     | no  |
| red-green                 | 0.01403  | < 0.05                          | yes | > 0.05/7                     | no  |
| yellow-green              | 0.01415  | < 0.05                          | yes | > 0.05/6                     | no  |
| orange-green              | 0.02812  | < 0.05                          | yes | > 0.05/5                     | no  |
| blue-green                | 0.3711   | > 0.05                          | no  | > 0.05/4                     | no  |
| orange-red                | 0.675    | > 0.05                          | no  | > 0.05/3                     | no  |
| orange-yellow             | 0.8923   | > 0.05                          | no  | > 0.05/2                     | no  |
| red-yellow                | 1        | > 0.05                          | no  | > 0.05/1                     | no  |
| <b>chases</b>             |          |                                 |     |                              |     |
| red-blue                  | 0.01403  | < 0.05                          | yes | > 0.05/10                    | no  |
| red-green                 | 0.01427  | < 0.05                          | yes | > 0.05/9                     | no  |
| yellow-blue               | 0.02249  | < 0.05                          | yes | > 0.05/8                     | no  |
| orange-red                | 0.05802  | > 0.05                          | no  | > 0.05/7                     | no  |
| yellow-green              | 0.05917  | > 0.05                          | no  | > 0.05/6                     | no  |
| orange-blue               | 0.0925   | > 0.05                          | no  | > 0.05/5                     | no  |
| red-yellow                | 0.1235   | > 0.05                          | no  | > 0.05/4                     | no  |
| orange-green              | 0.3604   | > 0.05                          | no  | > 0.05/3                     | no  |
| orange-yellow             | 0.4615   | > 0.05                          | no  | > 0.05/2                     | no  |
| blue-green                | 0.4615   | > 0.05                          | no  | > 0.05/1                     | no  |
| <b>pecks &amp; chases</b> |          |                                 |     |                              |     |
| red-blue                  | 0.001953 | < 0.05                          | yes | < 0.05/10                    | yes |
| red-green                 | 0.001953 | < 0.05                          | yes | < 0.05/9                     | yes |
| yellow-blue               | 0.001953 | < 0.05                          | yes | < 0.05/8                     | yes |
| yellow-green              | 0.001953 | < 0.05                          | yes | < 0.05/7                     | yes |
| orange-blue               | 0.01427  | < 0.05                          | yes | > 0.05/6                     | no  |
| orange-red                | 0.02439  | < 0.05                          | yes | > 0.05/5                     | no  |
| red-yellow                | 0.04136  | < 0.05                          | yes | > 0.05/4                     | no  |
| orange-green              | 0.08528  | > 0.05                          | no  | > 0.05/3                     | no  |
| blue-green                | 0.4185   | > 0.05                          | no  | > 0.05/2                     | no  |
| orange-yellow             | 0.4469   | > 0.05                          | no  | > 0.05/1                     | no  |
| yellow-green              | 0.5896   | > 0.05                          | no  | 0.05/1                       | no  |

**B3 *Pseudocrenilabrus multicolor* - males only (n = 10)**

Friedman test

| parameter      | p-value               |
|----------------|-----------------------|
| pecks          | 1.03*10 <sup>-4</sup> |
| chases         | 0.006                 |
| pecks & chases | 1.53*10 <sup>-4</sup> |

Wilcoxon signed-rank test

| parameter                 | p-value  | significant?                    |     | significant?                 |    |
|---------------------------|----------|---------------------------------|-----|------------------------------|----|
|                           |          | (without Bonferroni correction) |     | (with Bonferroni correction) |    |
| <b>pecks</b>              |          |                                 |     |                              |    |
| yellow-blue               | 0.008849 | < 0.05                          | yes | > 0.05/10                    | no |
| orange-blue               | 0.01403  | < 0.05                          | yes | > 0.05/9                     | no |
| orange-yellow             | 0.01782  | < 0.05                          | yes | > 0.05/8                     | no |
| red-blue                  | 0.02225  | < 0.05                          | yes | > 0.05/7                     | no |
| red-yellow                | 0.02249  | < 0.05                          | yes | > 0.05/6                     | no |
| yellow-green              | 0.08233  | > 0.05                          | no  | > 0.05/5                     | no |
| orange-green              | 0.1544   | > 0.05                          | no  | > 0.05/4                     | no |
| red-green                 | 0.2719   | > 0.05                          | no  | > 0.05/3                     | no |
| blue-green                | 0.3711   | > 0.05                          | no  | > 0.05/2                     | no |
| orange-red                | 1        | > 0.05                          | no  | > 0.05/1                     | no |
| <b>chases</b>             |          |                                 |     |                              |    |
| red-blue                  | 0.008849 | < 0.05                          | yes | > 0.05/10                    | no |
| orange-blue               | 0.01207  | < 0.05                          | yes | > 0.05/9                     | no |
| red-green                 | 0.05024  | > 0.05                          | no  | > 0.05/8                     | no |
| yellow-blue               | 0.1148   | > 0.05                          | no  | > 0.05/7                     | no |
| orange-red                | 0.1537   | > 0.05                          | no  | > 0.05/6                     | no |
| blue-green                | 0.1814   | > 0.05                          | no  | > 0.05/5                     | no |
| red-yellow                | 0.202    | > 0.05                          | no  | > 0.05/4                     | no |
| orange-green              | 0.3294   | > 0.05                          | no  | > 0.05/3                     | no |
| orange-yellow             | 0.4756   | > 0.05                          | no  | > 0.05/2                     | no |
| yellow-green              | 0.5896   | > 0.05                          | no  | > 0.05/1                     | no |
| <b>pecks &amp; chases</b> |          |                                 |     |                              |    |
| orange-blue               | 0.007842 | < 0.05                          | yes | > 0.05/10                    | no |
| yellow-blue               | 0.00903  | < 0.05                          | yes | > 0.05/9                     | no |
| red-blue                  | 0.009152 | < 0.05                          | yes | > 0.05/8                     | no |
| orange-yellow             | 0.01427  | < 0.05                          | yes | > 0.05/7                     | no |
| yellow-green              | 0.01437  | < 0.05                          | yes | > 0.05/6                     | no |
| red-green                 | 0.05041  | > 0.05                          | no  | > 0.05/5                     | no |
| orange-green              | 0.0921   | > 0.05                          | no  | > 0.05/4                     | no |
| blue-green                | 0.1003   | > 0.05                          | no  | > 0.05/3                     | no |
| red-yellow                | 0.2361   | > 0.05                          | no  | > 0.05/2                     | no |
| orange-red                | 0.7669   | > 0.05                          | no  | > 0.05/1                     | no |

**C1 *Julidochromis ornatus* - males and females (n = 20)**

Friedman test

| parameter      | p-value               |
|----------------|-----------------------|
| pecks & chases | 1.34*10 <sup>-6</sup> |

Wilcoxon signed-rank test

| parameter                 | p-value   | significant?                    |     | significant?                 |     |
|---------------------------|-----------|---------------------------------|-----|------------------------------|-----|
|                           |           | (without Bonferroni correction) |     | (with Bonferroni correction) |     |
| <b>pecks</b>              |           |                                 |     |                              |     |
| yellow-green              | 0.02833   | < 0.05                          | yes | > 0.05/10                    | no  |
| yellow-blue               | 0.1039    | > 0.05                          | no  | > 0.05/9                     | no  |
| red-yellow                | 0.1072    | > 0.05                          | no  | > 0.05/8                     | no  |
| orange-yellow             | 0.2615    | > 0.05                          | no  | > 0.05/7                     | no  |
| orange-green              | 0.3458    | > 0.05                          | no  | > 0.05/6                     | no  |
| red-green                 | 0.3711    | > 0.05                          | no  | > 0.05/5                     | no  |
| orange-blue               | 0.5708    | > 0.05                          | no  | > 0.05/4                     | no  |
| red-blue                  | 0.7103    | > 0.05                          | no  | > 0.05/3                     | no  |
| orange-red                | 0.8501    | > 0.05                          | no  | > 0.05/2                     | no  |
| blue-green                | 1         | > 0.05                          | no  | > 0.05/1                     | no  |
| <b>chases</b>             |           |                                 |     |                              |     |
| yellow-blue               | 0.0006785 | < 0.05                          | yes | < 0.05/10                    | yes |
| yellow-green              | 0.0006815 | < 0.05                          | yes | < 0.05/9                     | yes |
| red-yellow                | 0.002849  | < 0.05                          | yes | < 0.05/8                     | yes |
| orange-yellow             | 0.005581  | < 0.05                          | yes | < 0.05/7                     | yes |
| orange-blue               | 0.007378  | < 0.05                          | yes | < 0.05/6                     | yes |
| red-blue                  | 0.01144   | < 0.05                          | yes | > 0.05/5                     | no  |
| orange-green              | 0.06387   | > 0.05                          | no  | > 0.05/4                     | no  |
| blue-green                | 0.1165    | > 0.05                          | no  | > 0.05/3                     | no  |
| red-green                 | 0.2208    | > 0.05                          | no  | > 0.05/2                     | no  |
| orange-red                | 0.7533    | > 0.05                          | no  | > 0.05/1                     | no  |
| <b>pecks &amp; chases</b> |           |                                 |     |                              |     |
| yellow-green              | 0.0004924 | < 0.05                          | yes | < 0.05/10                    | yes |
| yellow-blue               | 0.0006513 | < 0.05                          | yes | < 0.05/9                     | yes |
| red-yellow                | 0.003092  | < 0.05                          | yes | < 0.05/8                     | yes |
| orange-yellow             | 0.01303   | < 0.05                          | yes | > 0.05/7                     | no  |
| orange-blue               | 0.01383   | < 0.05                          | yes | > 0.05/6                     | no  |
| red-blue                  | 0.01852   | < 0.05                          | yes | > 0.05/5                     | no  |
| orange-green              | 0.0425    | < 0.05                          | yes | > 0.05/4                     | no  |
| red-green                 | 0.04788   | < 0.05                          | yes | > 0.05/3                     | no  |
| blue-green                | 0.1163    | > 0.05                          | no  | > 0.05/2                     | no  |
| orange-red                | 0.7798    | > 0.05                          | no  | > 0.05/1                     | no  |

**C2 *Julidochromis ornatus* - females only (n = 11)**

Friedman test

| parameter      | p-value               |
|----------------|-----------------------|
| pecks          | 0.006                 |
| chases         | 8.53*10 <sup>-5</sup> |
| pecks & chases | 9.39*10 <sup>-5</sup> |

Wilcoxon signed-rank test

| parameter                 | p-value  | significant?                    |     | significant?                 |     |
|---------------------------|----------|---------------------------------|-----|------------------------------|-----|
|                           |          | (without Bonferroni correction) |     | (with Bonferroni correction) |     |
| <b>pecks</b>              |          |                                 |     |                              |     |
| orange-green              | 0.02627  | < 0.05                          | yes | > 0.05/10                    | no  |
| yellow-blue               | 0.02627  | < 0.05                          | yes | > 0.05/9                     | no  |
| orange-red                | 0.1039   | > 0.05                          | no  | > 0.05/8                     | no  |
| red-green                 | 0.1039   | > 0.05                          | no  | > 0.05/7                     | no  |
| orange-yellow             | 1        | > 0.05                          | no  | > 0.05/6                     | no  |
| orange-blue               | 1        | > 0.05                          | no  | > 0.05/5                     | no  |
| red-yellow                | 1        | > 0.05                          | no  | > 0.05/4                     | no  |
| red-blue                  | 1        | > 0.05                          | no  | > 0.05/3                     | no  |
| yellow-green              | 1        | > 0.05                          | no  | > 0.05/2                     | no  |
| blue-green                | 1        | > 0.05                          | no  | > 0.05/1                     | no  |
| <b>chases</b>             |          |                                 |     |                              |     |
| orange-yellow             | 0.00293  | < 0.05                          | yes | < 0.05/10                    | yes |
| red-yellow                | 0.005889 | < 0.05                          | yes | > 0.05/9                     | no  |
| yellow-green              | 0.005922 | < 0.05                          | yes | > 0.05/8                     | no  |
| yellow-blue               | 0.006665 | < 0.05                          | yes | > 0.05/7                     | no  |
| orange-blue               | 0.02493  | < 0.05                          | yes | > 0.05/6                     | no  |
| red-blue                  | 0.08293  | > 0.05                          | no  | > 0.05/5                     | no  |
| blue-green                | 0.1232   | > 0.05                          | no  | > 0.05/4                     | no  |
| orange-green              | 0.2084   | > 0.05                          | no  | > 0.05/3                     | no  |
| orange-blue               | 0.02493  | > 0.05                          | no  | > 0.05/2                     | no  |
| orange-red                | 1        | > 0.05                          | no  | > 0.05/1                     | no  |
| <b>pecks &amp; chases</b> |          |                                 |     |                              |     |
| red-yellow                | 0.003822 | < 0.05                          | yes | < 0.05/10                    | yes |
| yellow-green              | 0.005857 | < 0.05                          | yes | > 0.05/9                     | no  |
| yellow-blue               | 0.007963 | < 0.05                          | yes | > 0.05/8                     | no  |
| orange-yellow             | 0.00903  | < 0.05                          | yes | > 0.05/7                     | no  |
| orange-blue               | 0.08273  | > 0.05                          | no  | > 0.05/6                     | no  |
| blue-green                | 0.1824   | > 0.05                          | no  | > 0.05/5                     | no  |
| red-blue                  | 0.1846   | > 0.05                          | no  | > 0.05/4                     | no  |
| orange-green              | 0.2072   | > 0.05                          | no  | > 0.05/3                     | no  |
| red-green                 | 0.3428   | > 0.05                          | no  | > 0.05/2                     | no  |
| orange-red                | 1        | > 0.05                          | no  | > 0.05/1                     | no  |

**C3 *Julidochromis ornatus* - males only (n = 9)**

**Friedman test**

| parameter      | p-value |
|----------------|---------|
| pecks          | n.s.    |
| chases         | 0.032   |
| pecks & chases | 0.022   |

**Wilcoxon signed-rank test**

| parameter                 | p-value | significant?                    |     | significant?                 |    |
|---------------------------|---------|---------------------------------|-----|------------------------------|----|
|                           |         | (without Bonferroni correction) |     | (with Bonferroni correction) |    |
| <b>pecks</b>              |         |                                 |     |                              |    |
| orange-yellow             | 0.3711  | > 0.05                          | no  | > 0.05/10                    | no |
| orange-blue               | 0.3711  | > 0.05                          | no  | > 0.05/9                     | no |
| red-yellow                | 0.3711  | > 0.05                          | no  | > 0.05/8                     | no |
| red-blue                  | 0.3711  | > 0.05                          | no  | > 0.05/7                     | no |
| orange-red                | 1       | > 0.05                          | no  | > 0.05/6                     | no |
| orange-green              | 1       | > 0.05                          | no  | > 0.05/5                     | no |
| red-green                 | 1       | > 0.05                          | no  | > 0.05/4                     | no |
| yellow-green              | 1       | > 0.05                          | no  | > 0.05/3                     | no |
| blue-green                | 1       | > 0.05                          | no  | > 0.05/2                     | no |
| yellow-blue               | NA      | > 0.05                          | no  | > 0.05/1                     | no |
| <b>chases</b>             |         |                                 |     |                              |    |
| yellow-blue               | 0.05191 | > 0.05                          | no  | > 0.05/10                    | no |
| red-blue                  | 0.05906 | > 0.05                          | no  | > 0.05/9                     | no |
| orange-blue               | 0.07969 | > 0.05                          | no  | > 0.05/8                     | no |
| yellow-green              | 0.08006 | > 0.05                          | no  | > 0.05/7                     | no |
| red-yellow                | 0.1508  | > 0.05                          | no  | > 0.05/6                     | no |
| orange-green              | 0.2359  | > 0.05                          | no  | > 0.05/5                     | no |
| red-green                 | 0.2945  | > 0.05                          | no  | > 0.05/4                     | no |
| orange-yellow             | 0.3594  | > 0.05                          | no  | > 0.05/3                     | no |
| blue-green                | 0.5896  | > 0.05                          | no  | > 0.05/2                     | no |
| orange-red                | 0.8336  | > 0.05                          | no  | > 0.05/1                     | no |
| <b>pecks &amp; chases</b> |         |                                 |     |                              |    |
| red-blue                  | 0.03603 | < 0.05                          | yes | > 0.05/10                    | no |
| yellow-blue               | 0.05191 | > 0.05                          | no  | > 0.05/9                     | no |
| red-green                 | 0.05906 | > 0.05                          | no  | > 0.05/8                     | no |
| orange-blue               | 0.07969 | > 0.05                          | no  | > 0.05/7                     | no |
| yellow-green              | 0.08006 | > 0.05                          | no  | > 0.05/6                     | no |
| orange-green              | 0.1275  | > 0.05                          | no  | > 0.05/5                     | no |
| red-yellow                | 0.234   | > 0.05                          | no  | > 0.05/4                     | no |
| blue-green                | 0.4004  | > 0.05                          | no  | > 0.05/3                     | no |
| orange-yellow             | 0.4258  | > 0.05                          | no  | > 0.05/2                     | no |
| orange-red                | 0.8336  | > 0.05                          | no  | > 0.05/1                     | no |
